# Supplementary material for: PGC-1α inhibits the NLRP3 inflammasome via preserving mitochondrial viability to protect kidney fibrosis
Source: PubMed Central journal article supplement (PMC8748677; doi:10.1038/s41419-021-04480-3), 2022-01-10
Supplement: 41419_2021_4480_MOESM13_ESM.pdf [file 41419_2021_4480_MOESM13_ESM.pdf]

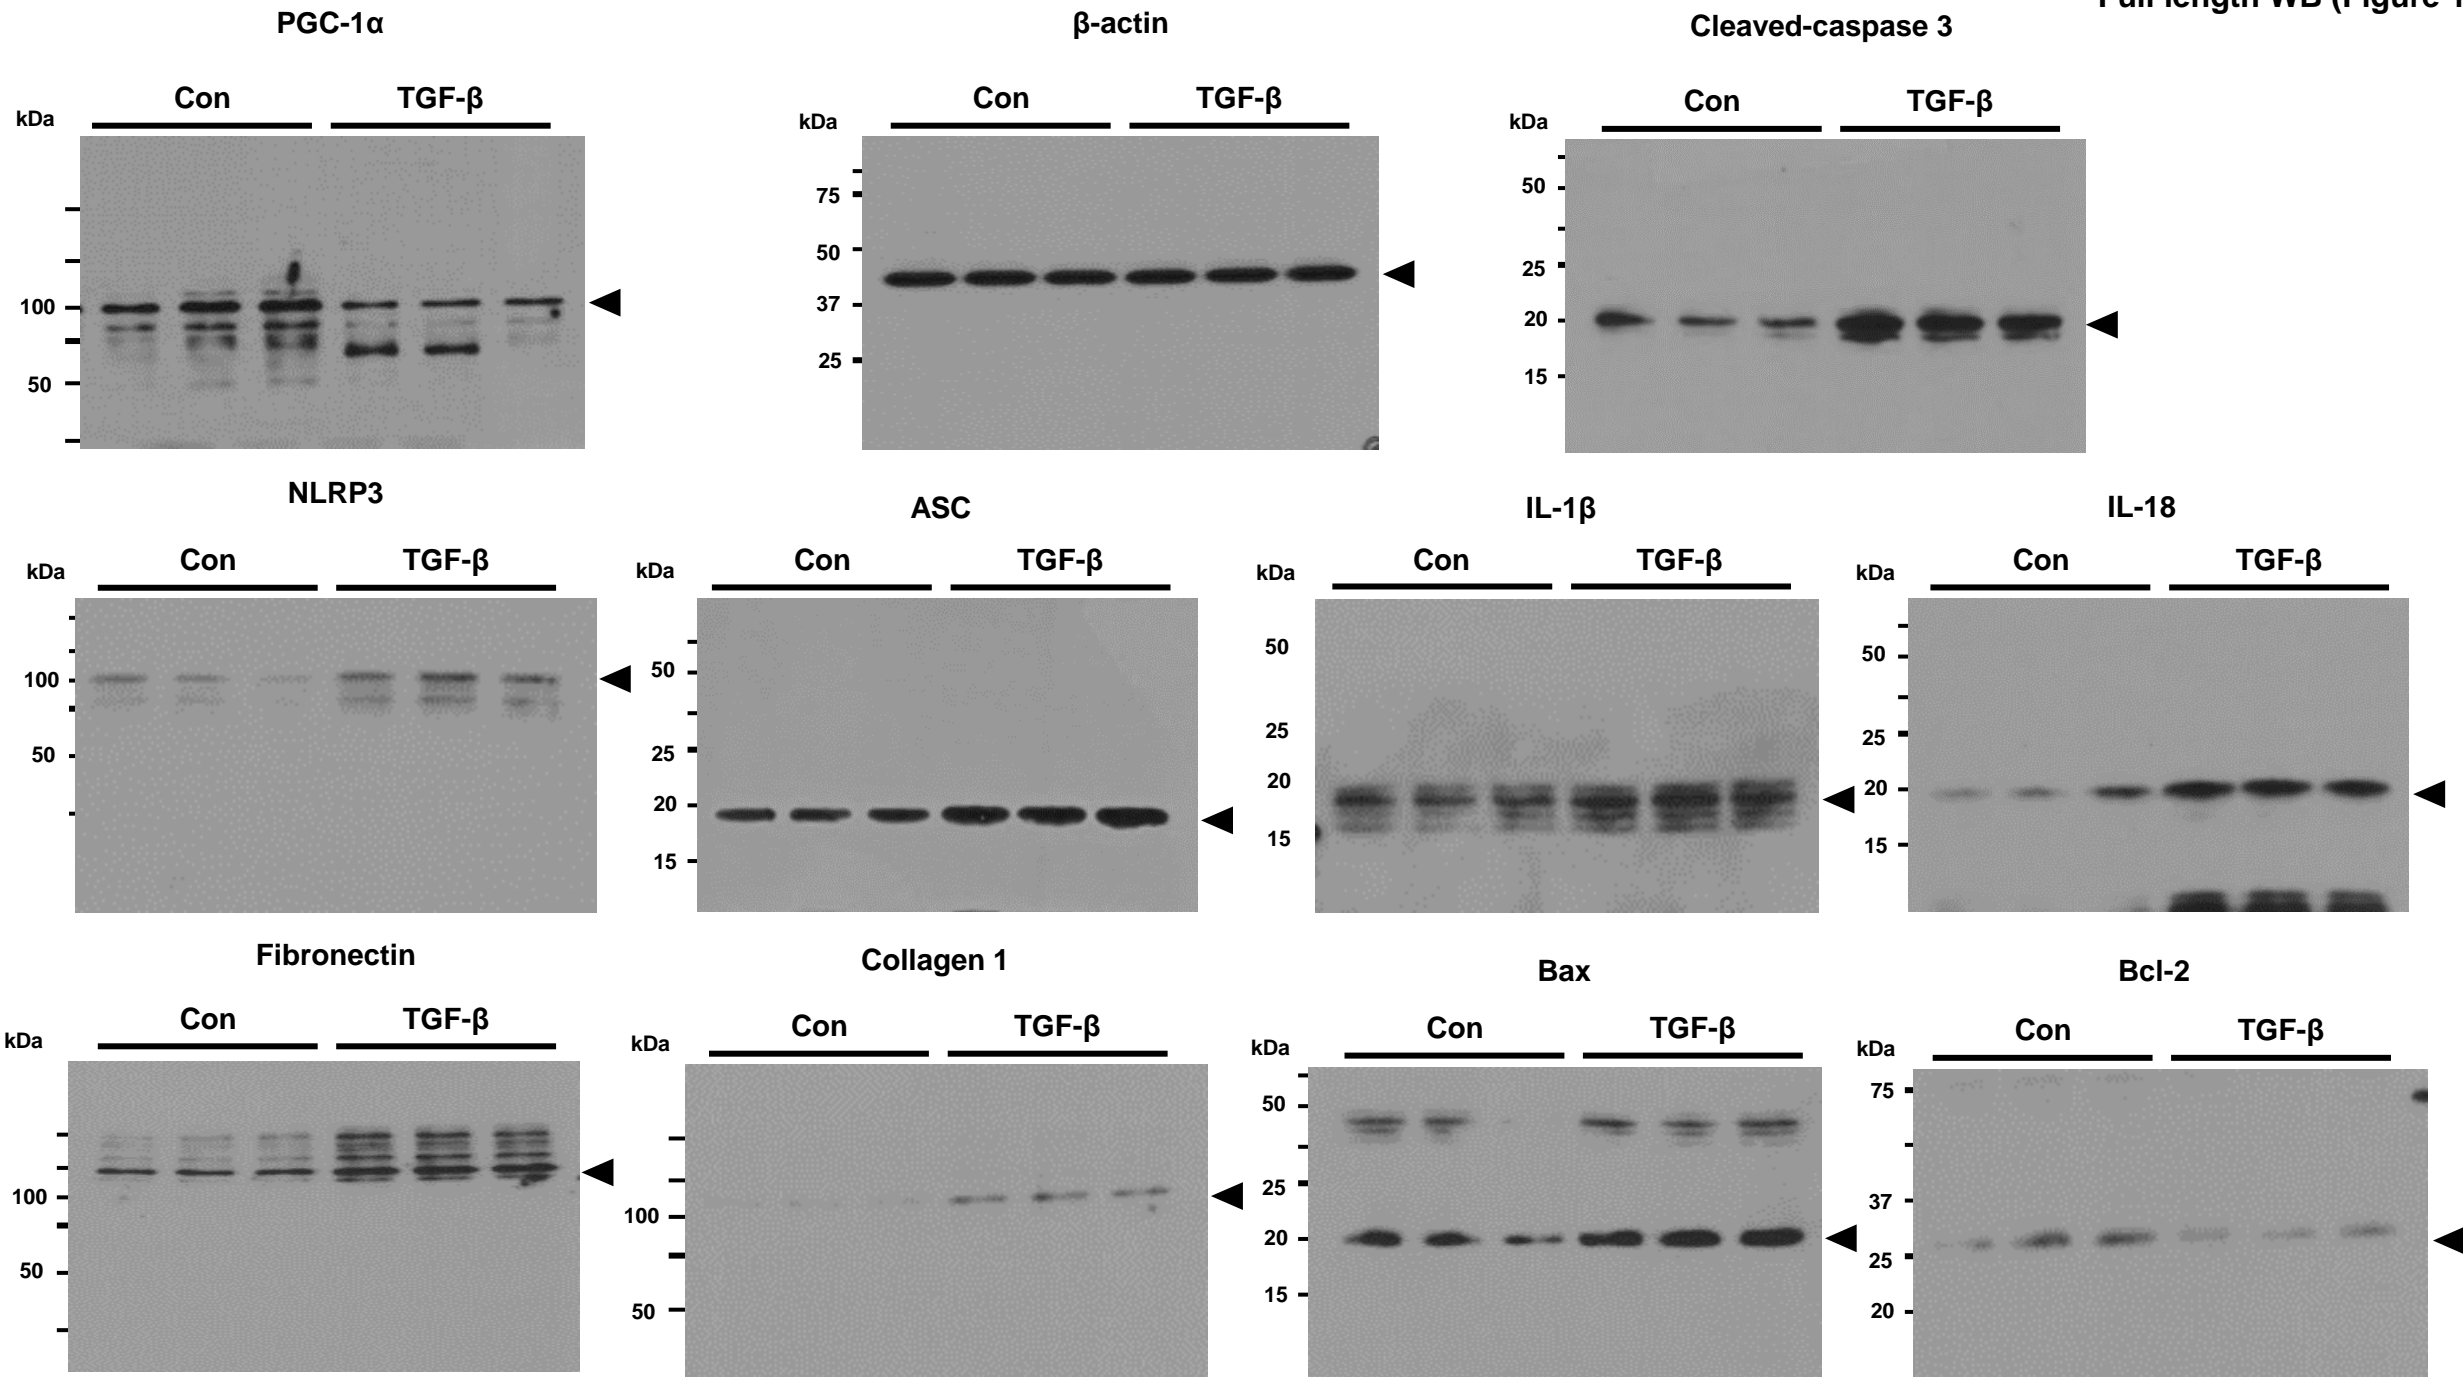

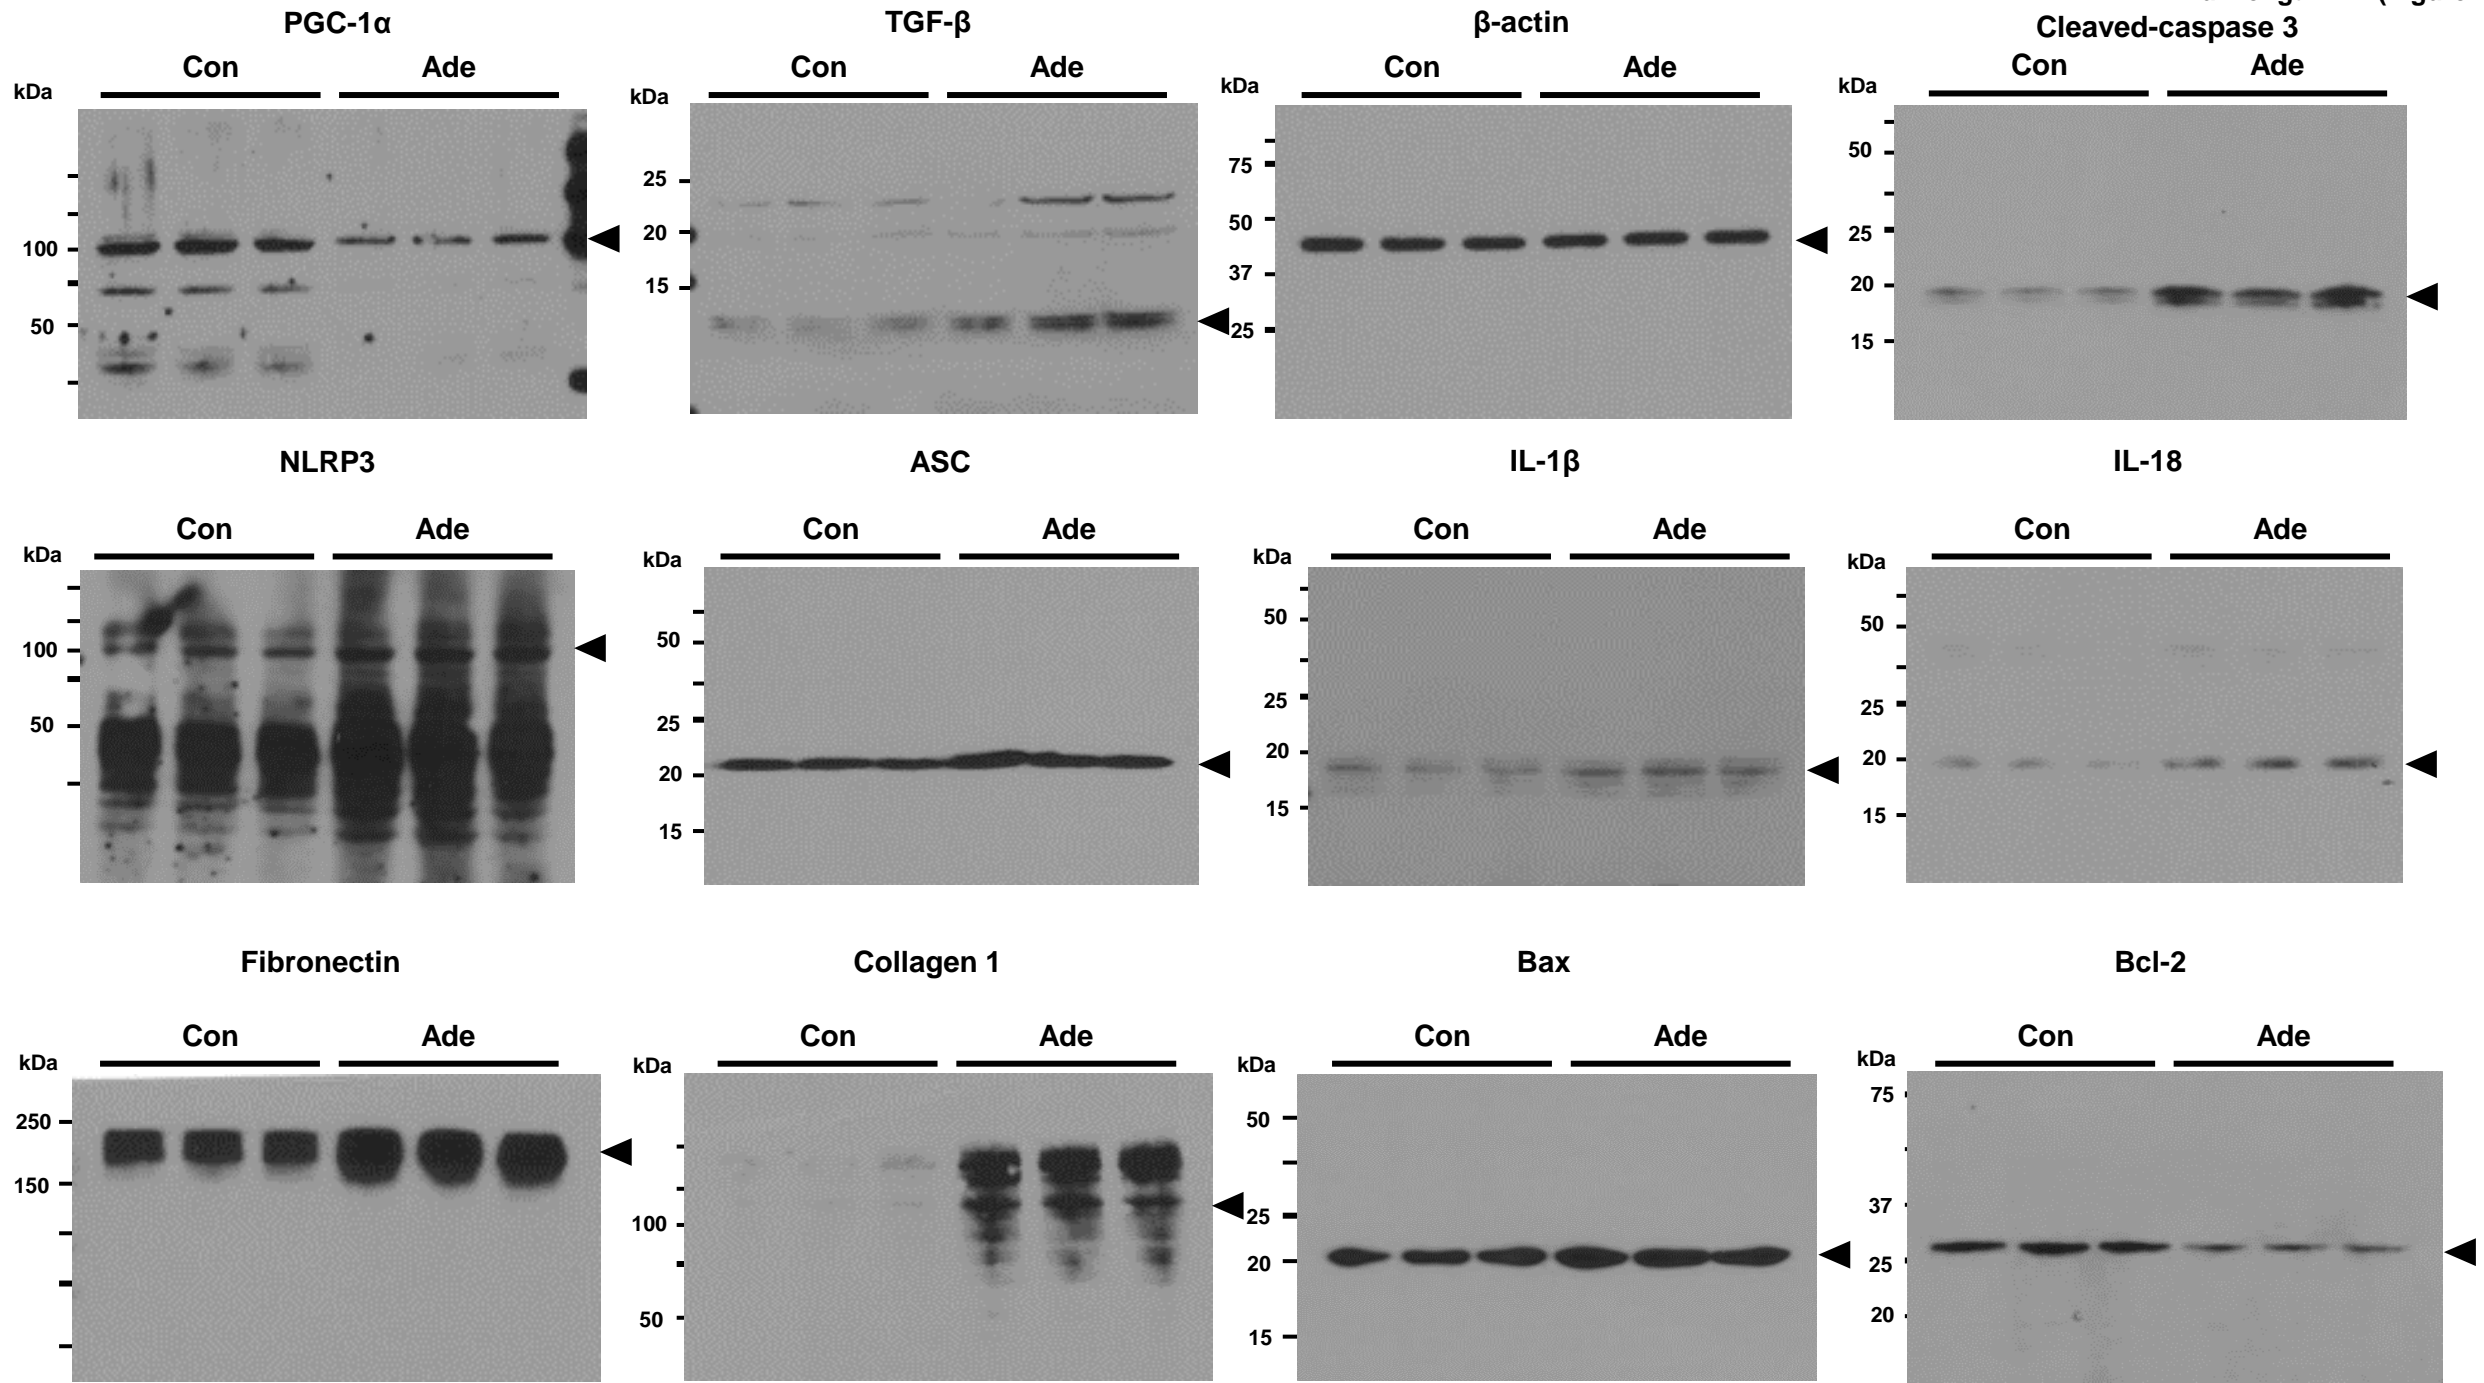

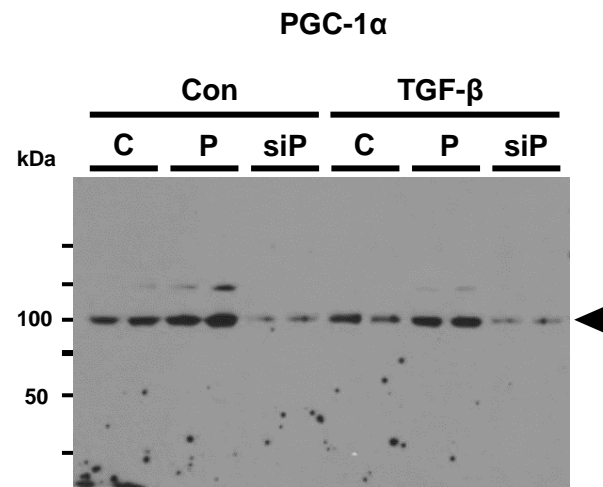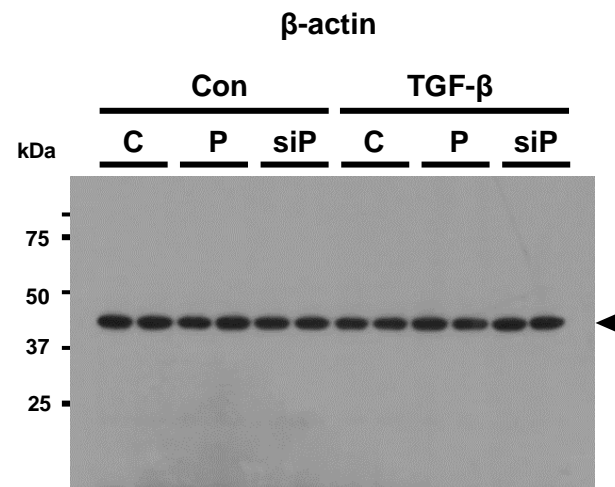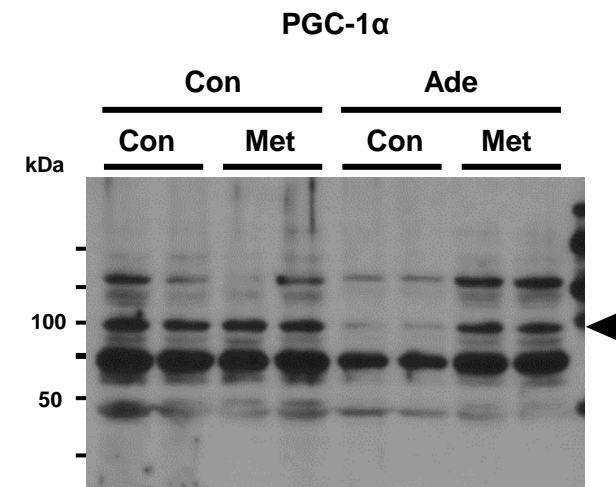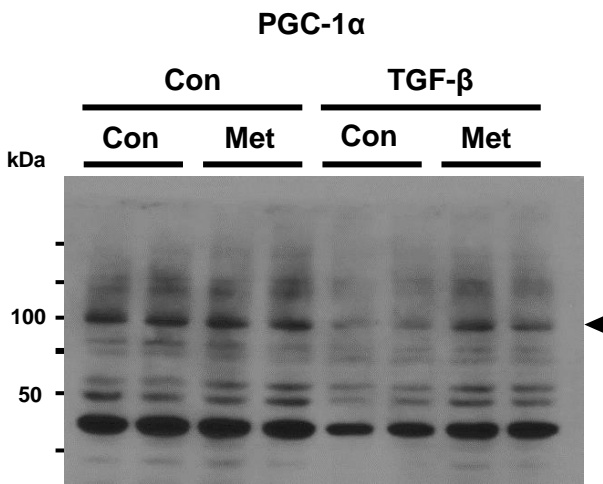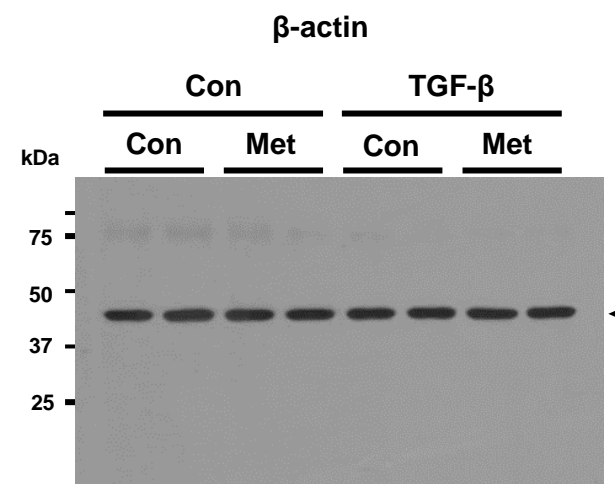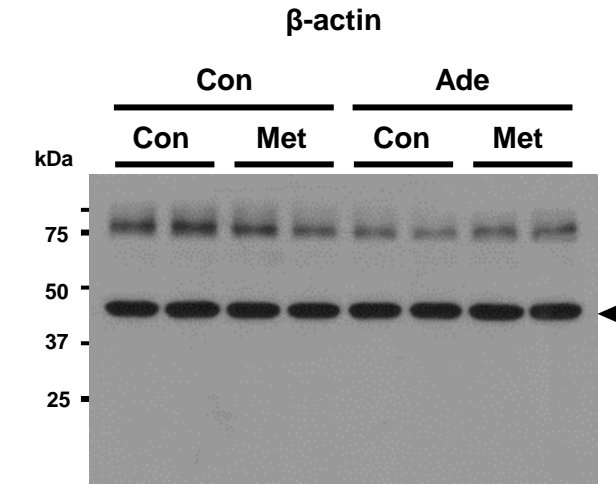

Abbreviation: C=control, P=PGC-1 $\alpha$ , siP=siPGC-1 $\alpha$

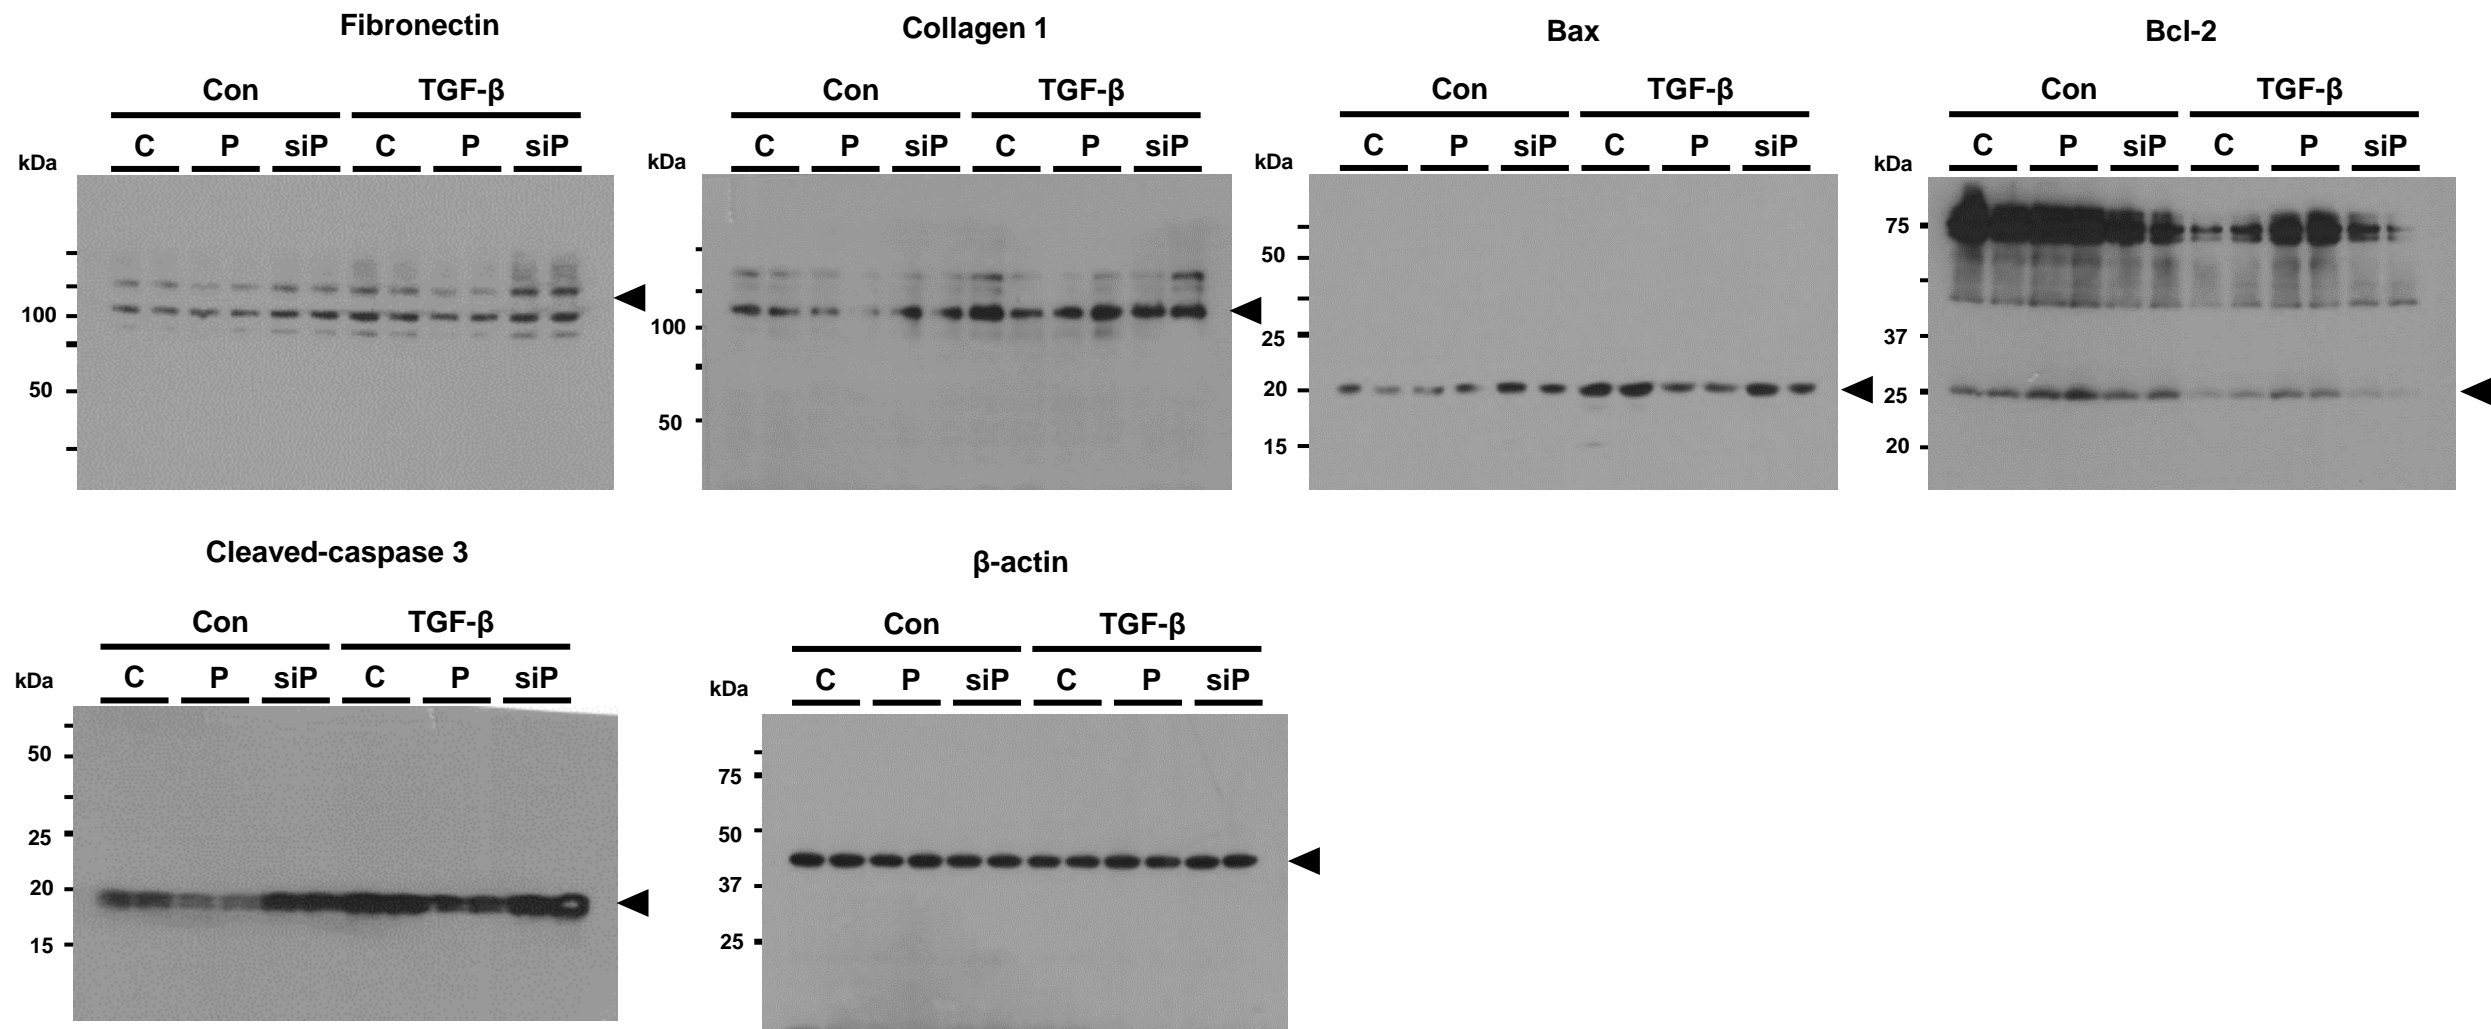

Abbreviation: C=control, P=PGC-1 $\alpha$ , siP=siPGC-1 $\alpha$

**Fibronectin**

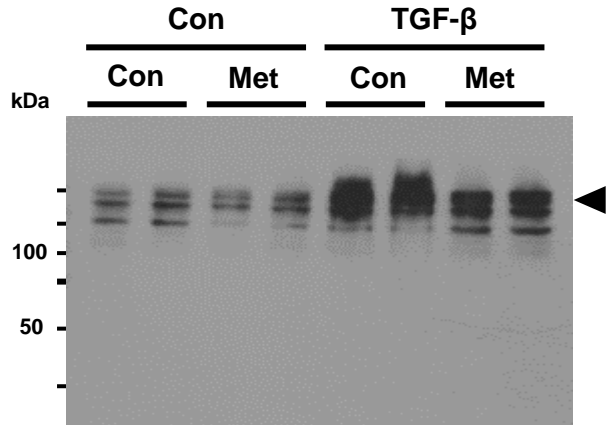

**Collagen 1**

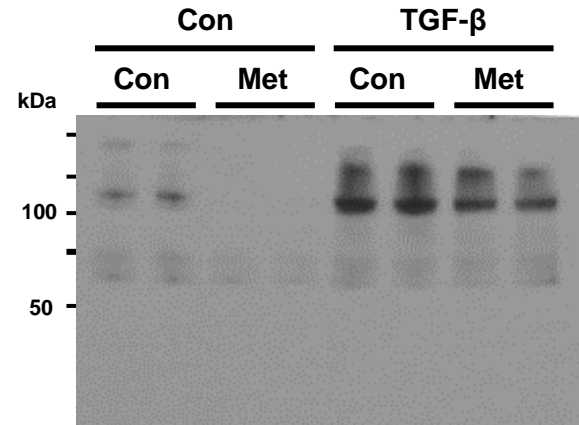

**Bax**

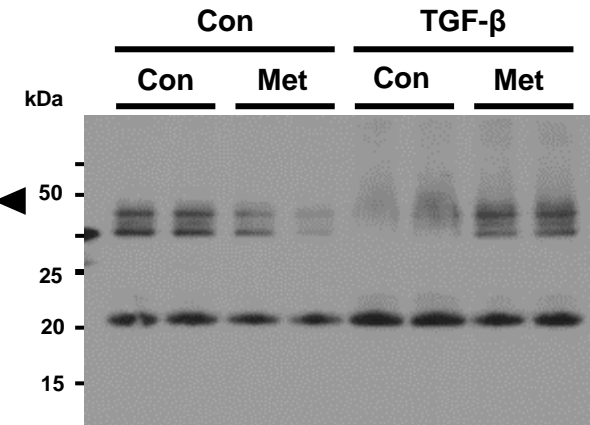

**Bcl-2**

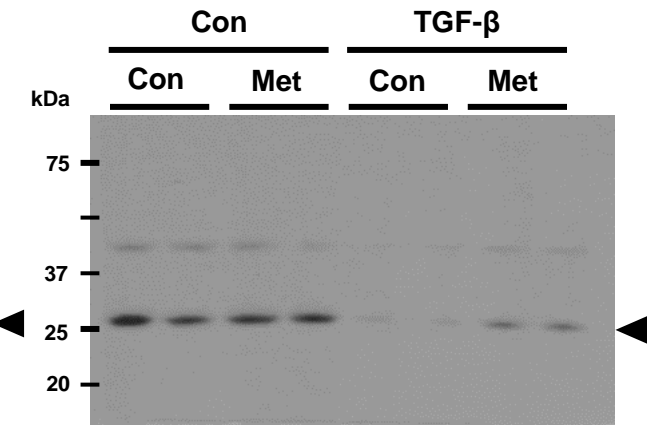

**Cleaved-caspase 3**

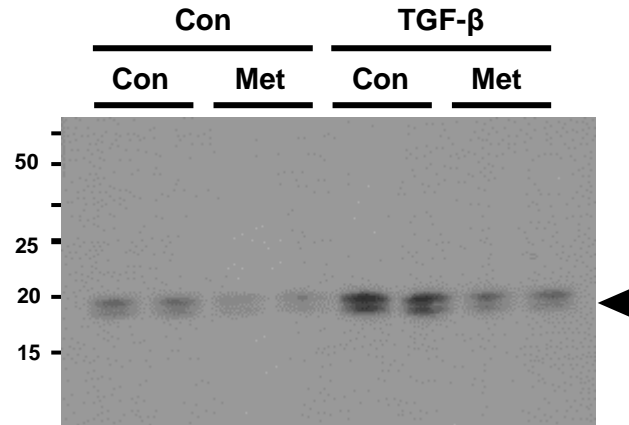

**β-actin**

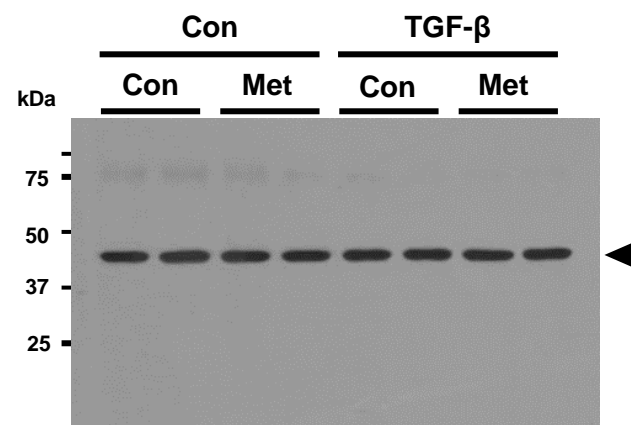

Fibronectin

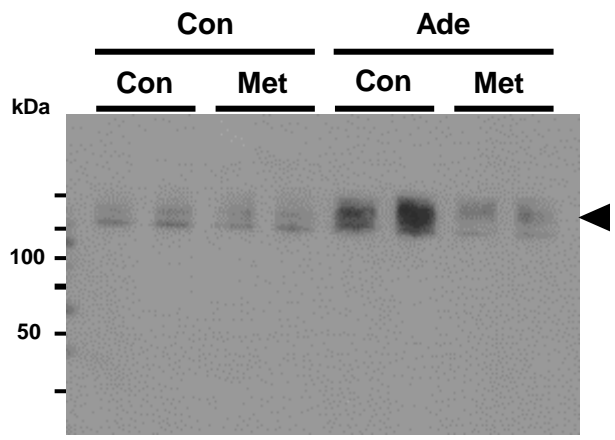

Collagen 1

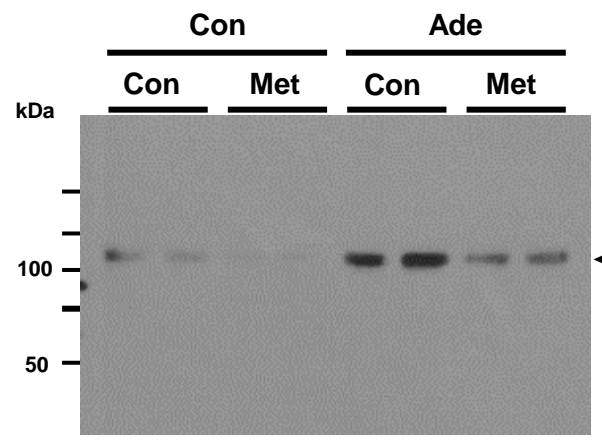

Bax

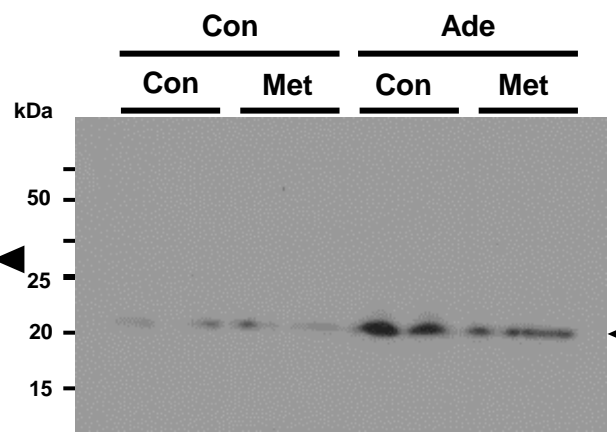

Bcl-2

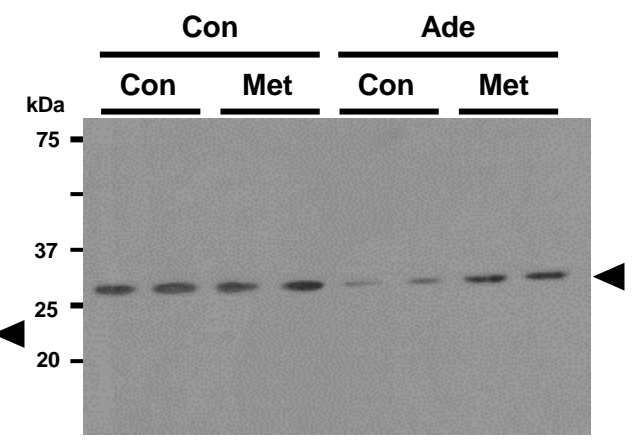

Cleaved-caspase 3

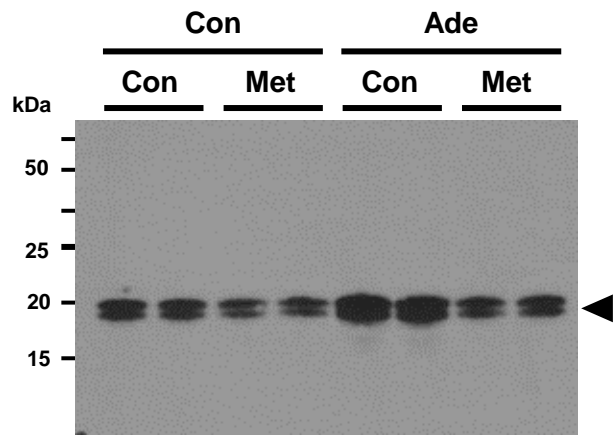

$\beta$ -actin

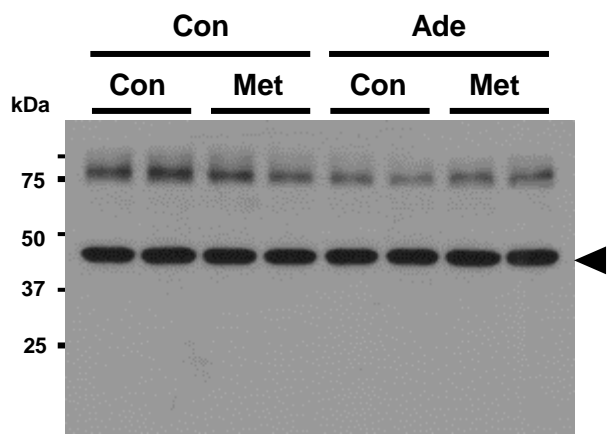

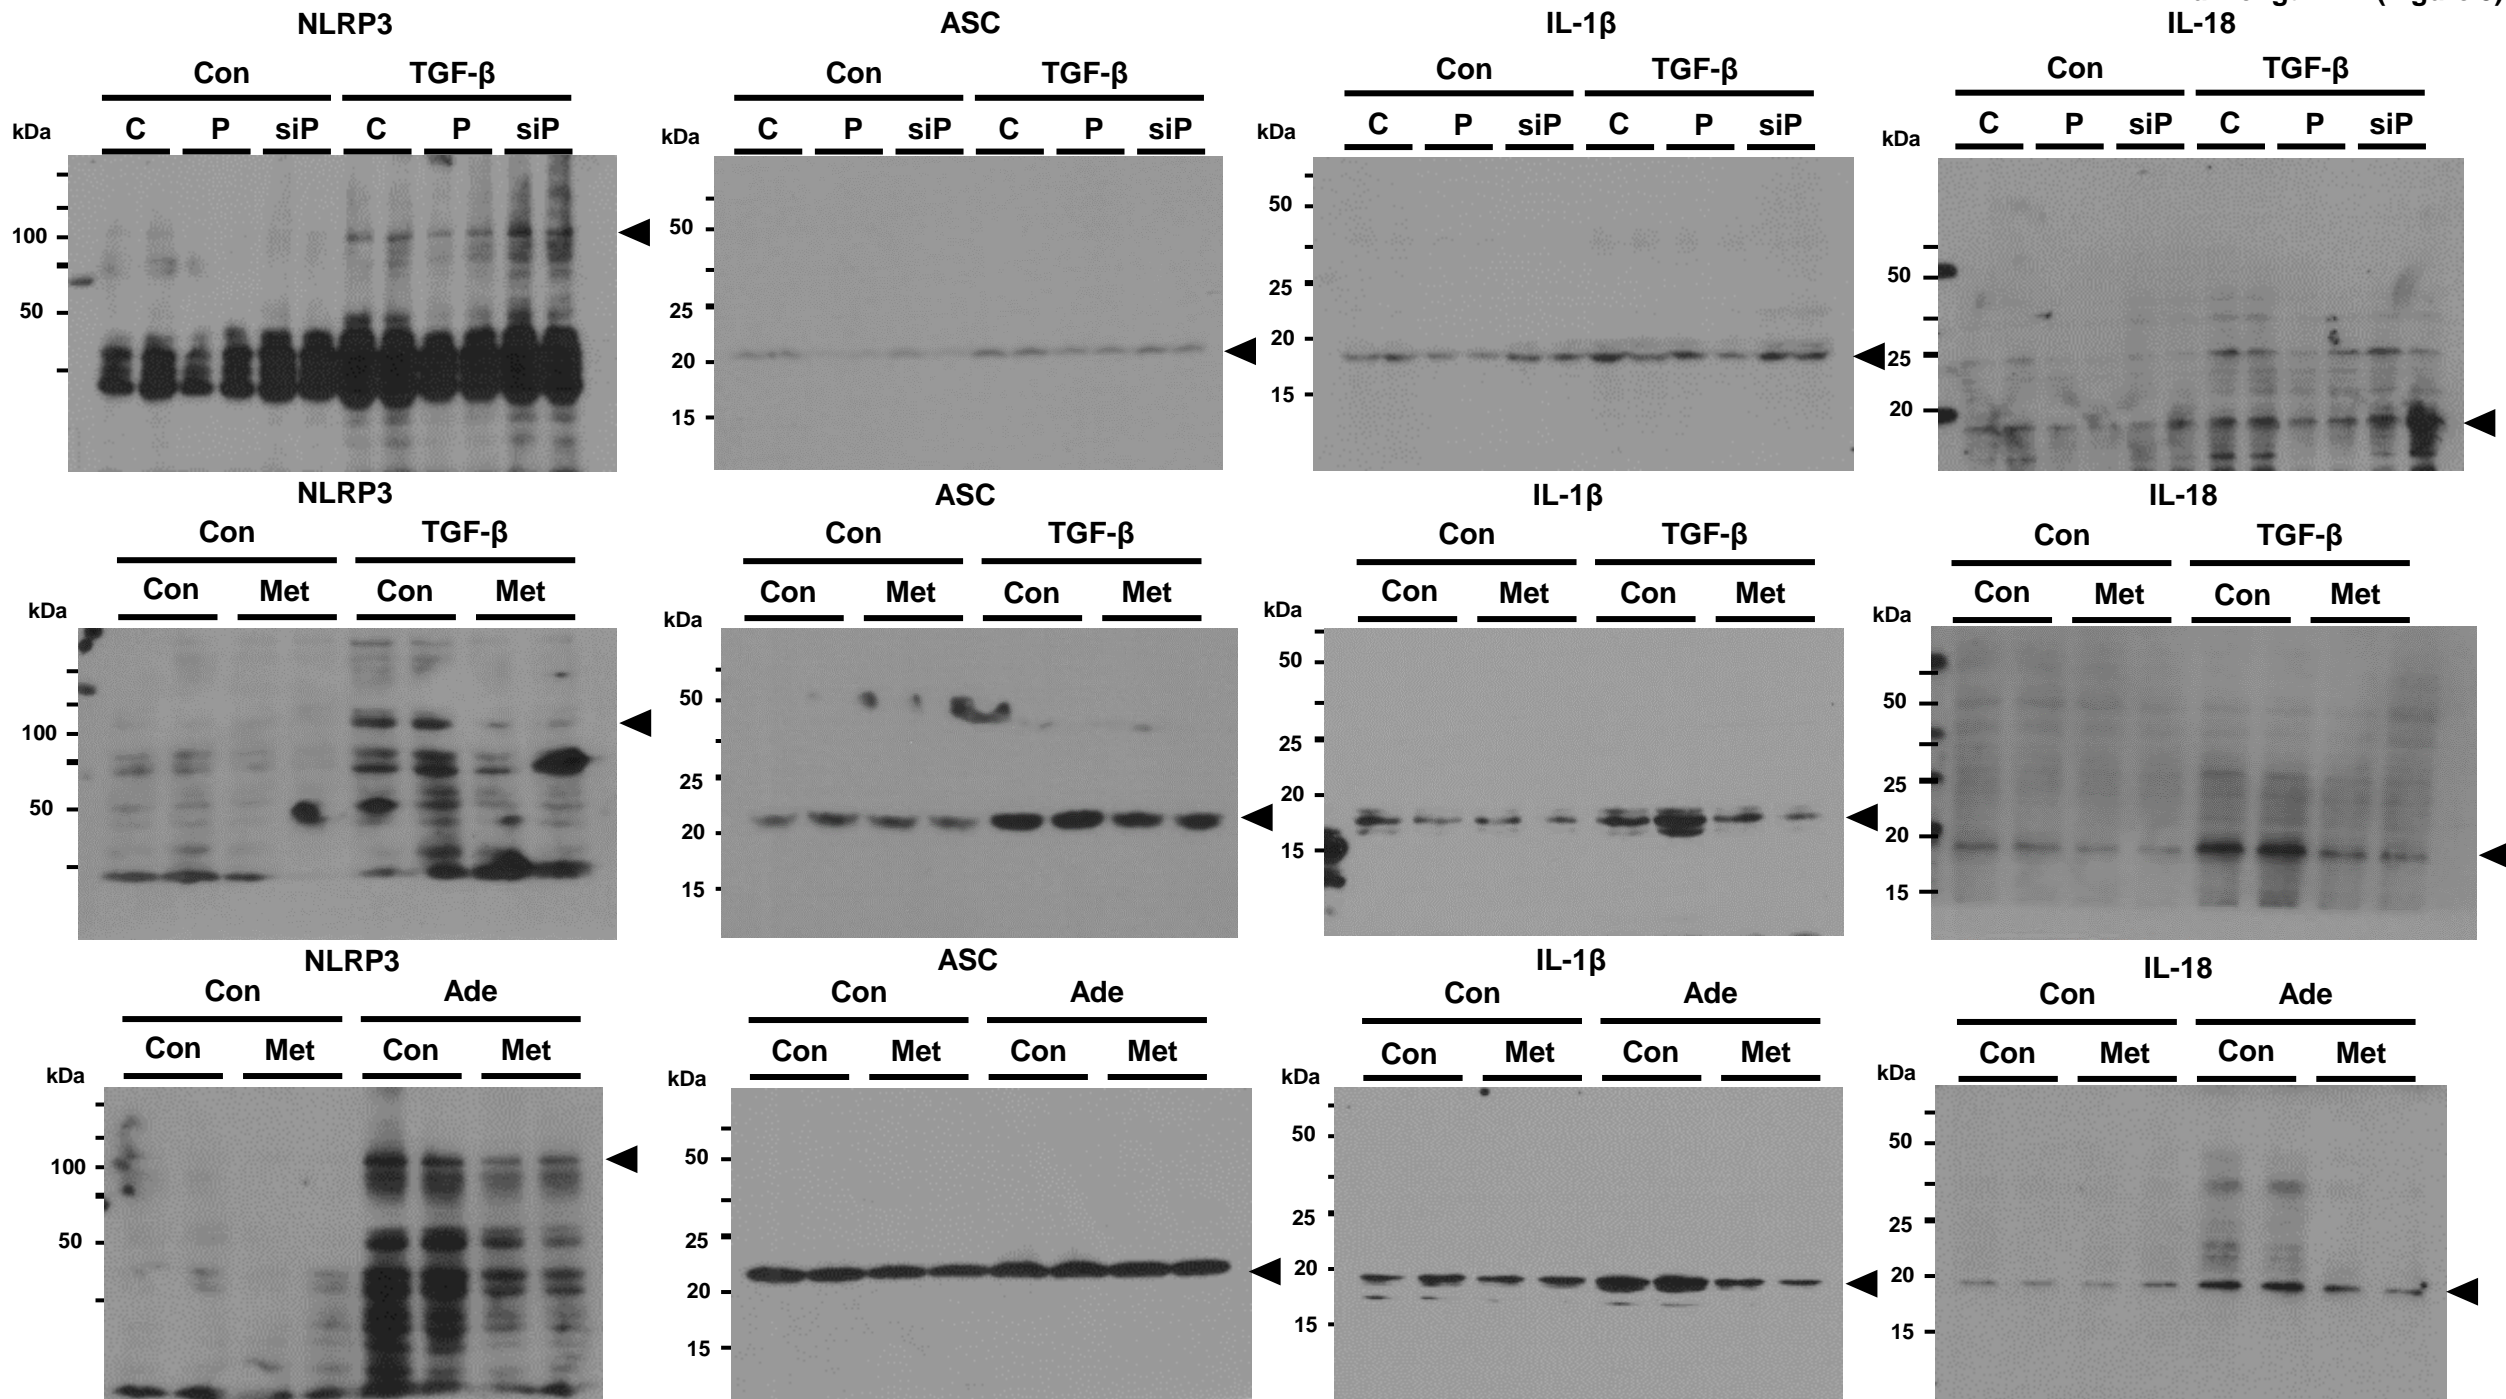

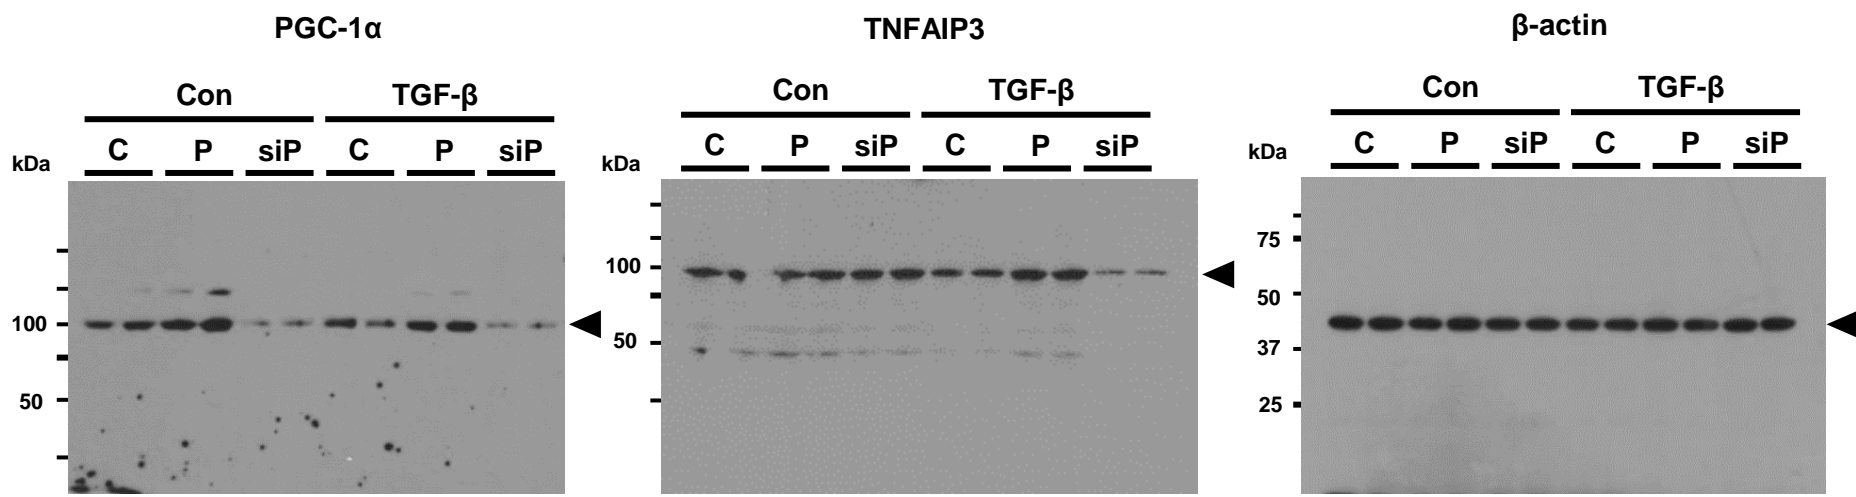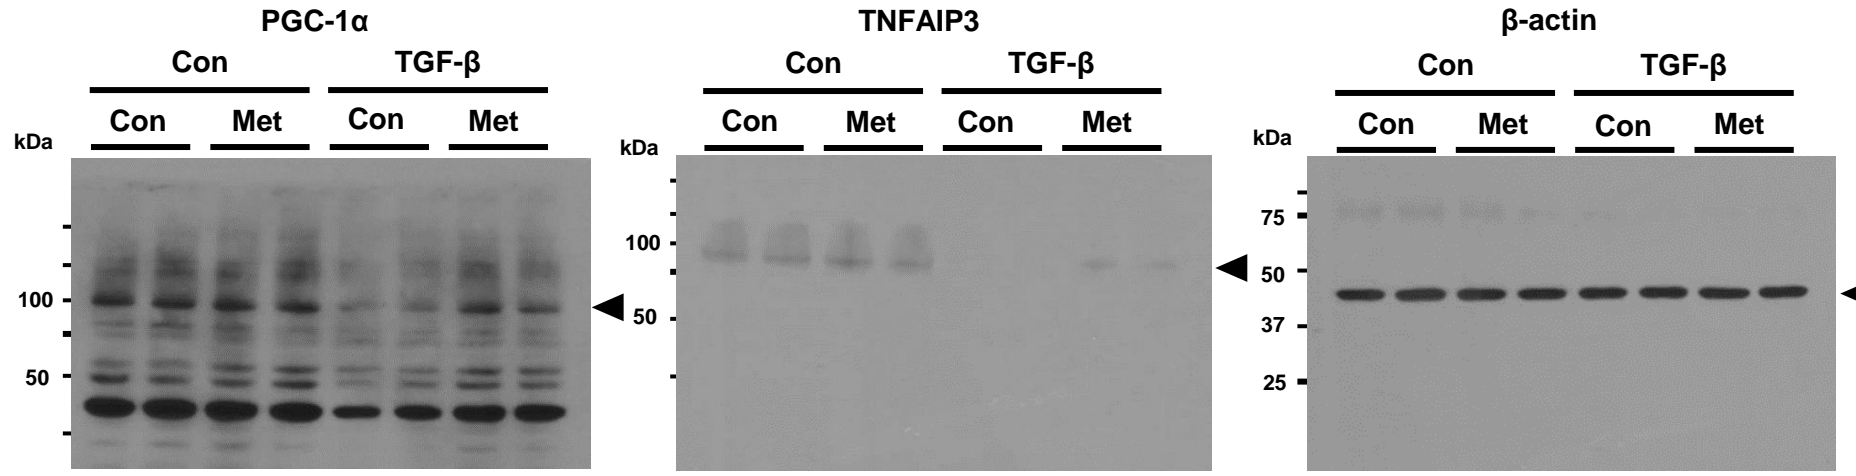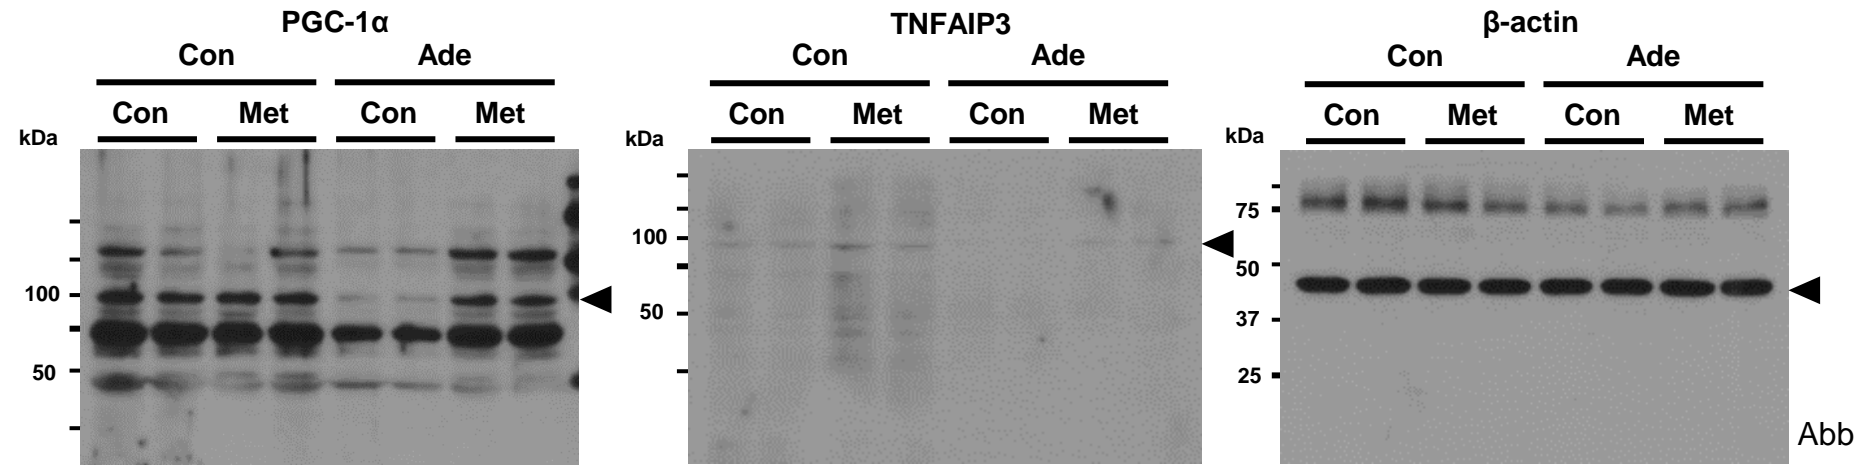

Abbreviation: C=control, P=PGC-1α, siP=siPGC-1α
